# Supplementary material for: In vitro degradation, biocompatibility and antibacterial properties of pure zinc: assessing the potential of Zn as a guided bone regeneration membrane
Source: Royal Society of Chemistry journal article supplement (doi:10.1039/d1tb00596k), 2021-01-01
Supplement: d1tb00596k1.pdf [file d1tb00596k1.pdf]

Supplementary information

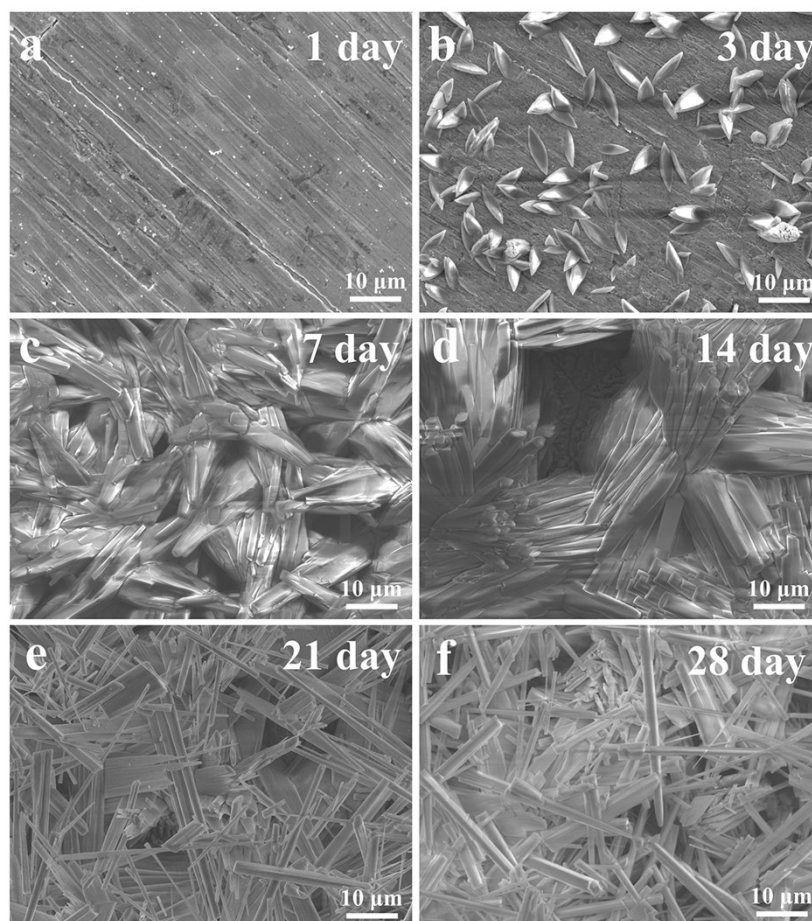

Fig. S1 Enlarged photographs of corrosion surface morphologies (before cleaning) of pure Zn soaked in artificial saliva (AS) solution for 28 days.

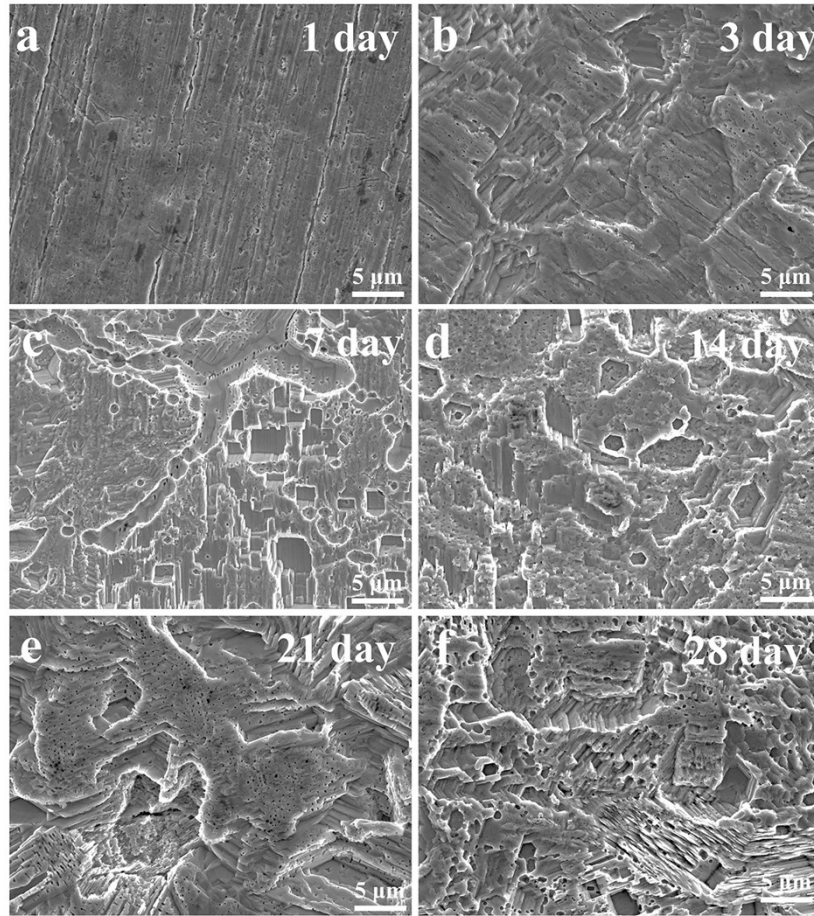

Fig. S2 Enlarged photographs of corrosion surface morphologies (after cleaning) of pure Zn soaked in artificial saliva (AS) solution for 28 days.
